# Supplementary material for: Upregulated long non-coding RNA AFAP1-AS1 expression is associated with progression and poor prognosis of nasopharyngeal carcinoma
Source: PubMed Central journal article supplement (PMC4653014; doi:10.18632/oncotarget.4057), 2015-05-09
Supplement: oncotarget-06-20404-s001.pdf [file oncotarget-06-20404-s001.pdf]

## **Upregulated long non-coding RNA AFAP1-AS1 expression is associated with progression and poor prognosis of nasopharyngeal carcinoma**

### **Supplementary Material**

**Supplemental Table S1.** Significantly dysregulated lncRNAs in the two NPC GEO datasets (GSE13452 and GSE64634) with SAM analysis

**Supplemental Table S2.** Clinicopathological data for 112 paraffin-embedded NPC biopsies and the AFAP1-AS1 expression levels of these samples as measured by *in situ* hybridization

**Supplemental Table S3.** AFAP1-AS1 regulated proteins in 5-8F cells identified by LC-MS analysis

**Supplemental Table S4.** Clinicopathological data for the 35 primary NPC biopsies and 11 NPE tissues used for gene profiling and qRT-PCR
